# Supplementary material for: Chronic high-fat diet in fathers programs β-cell dysfunction in female rat offspring
Source: Springer Nature journal article supplement (doi:10.1038/nature09491), 2010-10-01
Supplement: 41586_2010_BFnature09491_MOESM74_ESM.pdf [file 41586_2010_BFnature09491_MOESM74_ESM.pdf]

Morris\_Supplementary\_Table\_1

| Characteristics of dams mated with HFD and control males |                 |             |      |
|----------------------------------------------------------|-----------------|-------------|------|
| Group                                                    | control (n = 8) | HFD (n = 9) | P    |
| BW (g)                                                   | 291 ± 5         | 286 ± 6     | 0.53 |
| Mesenteric WAT (g)                                       | 2.29 ± 0.17     | 2.20 ± 0.16 | 0.73 |
| Retroperitoneal WAT (g)                                  | 3.06 ± 0.20     | 3.02 ± 0.43 | 0.93 |
| Gonadal WAT (g)                                          | 2.16 ± 0.21     | 2.29 ± 0.28 | 0.71 |
| Sum of WAT (g)                                           | 7.62 ± 0.53     | 7.51 ± 0.82 | 0.92 |
| Glucose (mM)                                             | 4.13 ± 0.06     | 4.27 ± 0.09 | 0.21 |
| Insulin (ng.ml <sup>-1</sup> )                           | 0.08 ± 0.02     | 0.08 ± 0.01 | 0.93 |
| HOMA-IR                                                  | 0.34 ± 0.07     | 0.34 ± 0.06 | 0.98 |

HFD, high fat diet. BW, body weight. WAT, white adipose tissue. Sum of WAT, sum of mesenteric, retroperitoneal and gonadal WAT. All results are expressed as mean ± s.e.m.

Morris\_Supplementary\_Table\_2

Summary of differentially expressed genes in islets of female offspring of HFD vs control fathers (P&lt;0.001)

| Gene Symbol    | RefSeq             | Probeset ID | Mean        |                 | HFD vs. control |          | GO biological process                                                                                        | GO cellular component                                                                           | GO molecular function                                                                                  |  |
|----------------|--------------------|-------------|-------------|-----------------|-----------------|----------|--------------------------------------------------------------------------------------------------------------|-------------------------------------------------------------------------------------------------|--------------------------------------------------------------------------------------------------------|--|
|                |                    |             | HFD a (n=5) | control a (n=6) | Fold-change b   | P value  |                                                                                                              |                                                                                                 |                                                                                                        |  |
| up-regulated   |                    |             |             |                 |                 |          |                                                                                                              |                                                                                                 |                                                                                                        |  |
| LOC881708      | ENSRNOT0000061706  | 1073343     | 5.46        | 4.96            | 1.42            | 6.66E-04 | —                                                                                                            | —                                                                                               | ENSRNOT0000061706 / GO:000166 / nucleotide binding / inferred from electronic annotation               |  |
| Mut4           | ENSRNOT0000010596  | 1035418     | 6.67        | 6.36            | 1.24            | 8.52E-04 | ENSRNOT0000010596 / GO:000468 / protein amino acid phosphorylation / inferred from electronic annotation     | —                                                                                               | ENSRNOT0000010596 / GO:000287 / magnesium ion binding / not recorded / ENSRNOT0000010596               |  |
| LOC168242      | NM_00109164        | 1072930     | 3.36        | 3.11            | 1.19            | 1.40E-04 | —                                                                                                            | —                                                                                               | —                                                                                                      |  |
| TubA3          | NM_130254          | 1008702     | 7.73        | 7.49            | 1.18            | 2.78E-04 | NM_130254 / GO:0007017 / microtubule-based process / inferred from electronic annotation                     | NM_130254 / GO:000822 / intracellular / inferred from electronic annotation / NM_130254         | NM_130254 / GO:000166 / nucleotide binding / inferred from electronic annotation / NM_130254           |  |
| Fam188b        | NM_001134633       | 1008711     | 4.83        | 4.39            | 1.18            | 9.51E-05 | —                                                                                                            | NM_001134633 / GO:004234 / protein complex / not recorded / ENSRNOT0000005472 / GO:004234       | —                                                                                                      |  |
| —              | —                  | 1002026     | 8.50        | 8.28            | 1.17            | 1.05E-04 | —                                                                                                            | —                                                                                               | —                                                                                                      |  |
| LOC102624      | NM_001092674       | 1007073     | 7.05        | 6.83            | 1.17            | 8.05E-04 | —                                                                                                            | —                                                                                               | —                                                                                                      |  |
| MGC12612       | NM_001092638       | 1007170     | 7.33        | 7.11            | 1.16            | 4.25E-04 | NM_001092638 / GO:0006330 / transcription / inferred from electronic annotation / NM_001092638               | NM_001092638 / GO:000523 / intracellular / inferred from electronic annotation / NM_001092638   | NM_001092638 / GO:000376 / nucleic acid binding / inferred from electronic annotation                  |  |
| Slc3a5         | NM_138854          | 1003699     | 11.75       | 11.56           | 1.14            | 5.23E-04 | NM_138854 / GO:001954 / neutral amino acid transport / inferred from direct assay / NM_138854                | —                                                                                               | NM_138854 / GO:0010171 / amino acid transmembrane transporter activity                                 |  |
| Bimk           | NM_001024163       | 1074546     | 6.96        | 6.78            | 1.13            | 8.87E-04 | NM_001024163 / GO:0006308 / proteolysis / inferred from electronic annotation / NM_001024163                 | NM_001024163 / GO:000525 / soluble fraction / not recorded / ENSRNOT0000005125 / GO:000625      | NM_001024163 / GO:0004197 / cysteine-type endopeptidase activity / inferred from electronic annotation |  |
| Vtic16         | NM_001008911       | 10610818    | 2.96        | 2.78            | 1.13            | 7.94E-04 | NM_001008911 / GO:0007186 / G-protein coupled receptor protein signaling pathway                             | NM_001008911 / GO:0016021 / integral to membrane / inferred from electronic annotation          | NM_001008911 / GO:0004872 / receptor activity / inferred from electronic annotation                    |  |
| Htt161         | NM_181627          | 1071649     | 7.49        | 7.31            | 1.13            | 5.71E-04 | —                                                                                                            | NM_181627 / GO:0005624 / membrane fraction / inferred from direct assay                         | NM_181627 / GO:0005015 / protein binding / inferred from physical interaction / AY291962               |  |
| Cd321          | ENSRNOT0000023274  | 1007480     | 6.98        | 6.82            | 1.12            | 1.80E-04 | ENSRNOT0000023274 / GO:000468 / protein amino acid phosphorylation / inferred from electronic annotation     | ENSRNOT0000023274 / GO:0005634 / nucleus / inferred from electronic annotation                  | ENSRNOT0000023274 / GO:000166 / nucleotide binding / inferred from electronic annotation               |  |
| —              | —                  | 10716742    | 5.26        | 5.11            | 1.12            | 8.99E-04 | —                                                                                                            | —                                                                                               | —                                                                                                      |  |
| Ohv57          | NM_001000689       | 10637512    | 2.88        | 2.42            | 1.11            | 1.97E-04 | NM_001000689 / GO:0007186 / G-protein coupled receptor protein signaling pathway                             | NM_001000689 / GO:0016021 / integral to membrane / inferred from electronic annotation          | NM_001000689 / GO:0004984 / olfactory receptor activity / inferred from electronic annotation          |  |
| LOC1683986     | QSOX3251           | 1066210     | 8.40        | 8.26            | 1.11            | 7.26E-04 | —                                                                                                            | —                                                                                               | —                                                                                                      |  |
| —              | —                  | 10682571    | 8.46        | 8.33            | 1.09            | 7.31E-05 | —                                                                                                            | —                                                                                               | —                                                                                                      |  |
| Spat           | NM_001108702       | 1008879     | 8.06        | 7.93            | 1.09            | 6.49E-05 | NM_001108702 / GO:0001578 / microtubule bundle formation                                                     | NM_001108702 / GO:0005634 / nucleus / inferred from sequence or structural similarity           | NM_001108702 / GO:0000166 / nucleotide binding / inferred from electronic annotation                   |  |
| Cxv1           | ENSRNOT0000011865  | 1073775     | 8.14        | 8.05            | 1.07            | 4.52E-04 | ENSRNOT0000011865 / GO:0006333 / chromatin assembly or disassembly                                           | ENSRNOT0000011865 / GO:000775 / chromosome, centromeric region / not recorded                   | ENSRNOT0000011865 / GO:0003682 / chromatin binding / inferred from electronic annotation               |  |
| Tot1           | NM_001025735       | 1071953     | 9.80        | 9.81            | 1.07            | 3.26E-04 | NM_001025735 / GO:0005634 / RNA elongation / inferred from electronic annotation / NM_001025735              | NM_001025735 / GO:0003677 / RNA binding / inferred from electronic annotation / NM_001025735    | NM_001025735 / GO:0003677 / RNA binding / inferred from electronic annotation / NM_001025735           |  |
| Cxv3           | NM_001008313       | 1061635     | 9.51        | 9.44            | 1.05            | 4.11E-05 | NM_001008313 / GO:0006333 / chromatin assembly or disassembly / inferred from electronic annotation          | NM_001008313 / GO:0000785 / chromatin / inferred from electronic annotation / NM_001008313      | NM_001008313 / GO:0003682 / chromatin binding / inferred from electronic annotation                    |  |
| down-regulated |                    |             |             |                 |                 |          |                                                                                                              |                                                                                                 |                                                                                                        |  |
| Dock5          | NM_001114621       | 1083824     | 5.37        | 5.94            | -1.48           | 2.39E-04 | NM_001114621 / GO:0007242 / intracellular signaling cascade / inferred from electronic annotation            | —                                                                                               | —                                                                                                      |  |
| LOC162863      | XR_008675          | 10071081    | 4.13        | 4.64            | -1.43           | 4.00E-04 | —                                                                                                            | —                                                                                               | —                                                                                                      |  |
| Emf4p          | NM_001007588       | 10030717    | 3.75        | 4.17            | -1.34           | 5.66E-04 | NM_001007588 / GO:0007218 / neurotransmitter signaling pathway / inferred from electronic annotation         | NM_001007588 / GO:000886 / plasma membrane / inferred from electronic annotation                | NM_001007588 / GO:0004930 / G-protein coupled receptor activity / inferred from electronic annotation  |  |
| Car7           | NM_001106165       | 10083007    | 4.44        | 4.84            | -1.32           | 8.11E-04 | NM_001106165 / GO:0006730 / one-carbon metabolic process / inferred from electronic annotation               | —                                                                                               | NM_001106165 / GO:0004989 / carbonate dehydratase activity / inferred from electronic annotation       |  |
| LOC26521       | NM_001008879       | 10053962    | 4.48        | 4.86            | -1.30           | 5.90E-04 | —                                                                                                            | —                                                                                               | —                                                                                                      |  |
| Znf56          | ENSRNOT00000003296 | 1003998     | 5.61        | 5.94            | -1.25           | 4.69E-04 | —                                                                                                            | —                                                                                               | —                                                                                                      |  |
| —              | —                  | 10739686    | 7.25        | 7.58            | -1.25           | 2.79E-04 | —                                                                                                            | —                                                                                               | —                                                                                                      |  |
| Pgap1          | NM_001135164       | 1072799     | 6.41        | 6.24            | -1.26           | 7.25E-04 | NM_001135164 / GO:0007185 / signal transduction / inferred from electronic annotation                        | NM_001135164 / GO:000886 / plasma membrane / inferred from electronic annotation                | NM_001135164 / GO:000785 / prostaglandin / receptor activity / not recorded / NM_001135164             |  |
| LOC130798      | NM_001144850       | 10077448    | 5.76        | 6.08            | -1.25           | 6.01E-04 | NM_001144850 / GO:0006329 / lipid metabolic process / inferred from electronic annotation                    | NM_001144850 / GO:0005194 / lysosome / inferred from electronic annotation                      | —                                                                                                      |  |
| —              | —                  | 10088019    | 6.60        | 6.91            | -1.25           | 3.98E-04 | —                                                                                                            | —                                                                                               | —                                                                                                      |  |
| LOC168399      | ENSRNOT0000011883  | 10714930    | 7.31        | 7.62            | -1.24           | 6.23E-04 | ENSRNOT0000011883 / GO:0006045 / glycine catabolic process / inferred from electronic annotation             | ENSRNOT0000011883 / GO:0005739 / mitochondrion / inferred from electronic annotation            | —                                                                                                      |  |
| Ohv57          | NM_001000689       | 10637512    | 5.07        | 5.38            | -1.24           | 4.76E-04 | NM_001000689 / GO:0007186 / G-protein coupled receptor protein signaling pathway                             | NM_001000689 / GO:0016021 / integral to membrane / inferred from electronic annotation          | NM_001000689 / GO:0004872 / receptor activity / inferred from electronic annotation                    |  |
| LOC130824      | NM_001134517       | 1064393     | 4.16        | 4.47            | -1.24           | 6.37E-04 | —                                                                                                            | —                                                                                               | —                                                                                                      |  |
| —              | —                  | 1078220     | 1.91        | 2.20            | -1.23           | 4.16E-04 | —                                                                                                            | —                                                                                               | —                                                                                                      |  |
| Cyp4a3         | NM_175760          | 1008797     | 4.72        | 5.02            | -1.23           | 6.01E-04 | NM_175760 / GO:0001822 / kidney development / inferred from expression pattern / NM_175760                   | NM_175760 / GO:000570 / endoplasmic reticulum / inferred from electronic annotation             | NM_175760 / GO:0008391 / arachidonic acid monooxygenase activity / inferred from mutant phenotype      |  |
| Atb1           | NM_001109238       | 1008969     | 4.88        | 5.18            | -1.23           | 4.32E-04 | NM_001109238 / GO:0001764 / neuron migration / not recorded / NM_001109238 / GO:0008915                      | —                                                                                               | NM_001109238 / GO:0003677 / RNA binding / not recorded / NM_001109238 / GO:0008915                     |  |
| Stp5a          | NM_0211775         | 10015955    | 4.79        | 5.08            | -1.23           | 1.73E-04 | NM_0211775 / GO:0007185 / signal transduction / inferred from electronic annotation / NM_0211775             | NM_0211775 / GO:000886 / plasma membrane / inferred from electronic annotation / NM_0211775     | NM_0211775 / GO:0001619 / lysophosphatidyl and lysophosphatidic acid receptor activity                 |  |
| Fu6b           | ENSRNOT00000005941 | 10087398    | 6.17        | 6.47            | -1.23           | 2.54E-04 | —                                                                                                            | ENSRNOT00000005941 / GO:0005634 / nucleus / not recorded / ENSRNOT00000005941 / GO:000537       | —                                                                                                      |  |
| Fam132b        | ENSRNOT0000001810  | 10025415    | 5.79        | 6.09            | -1.23           | 3.04E-04 | —                                                                                                            | —                                                                                               | —                                                                                                      |  |
| LOC88899       | ENSRNOT00000034362 | 10083332    | 6.15        | 6.44            | -1.23           | 1.68E-04 | —                                                                                                            | —                                                                                               | —                                                                                                      |  |
| Wap2           | NM_031590          | 10042043    | 5.92        | 6.21            | -1.22           | 4.43E-05 | NM_031590 / GO:0001598 / regulation of cell growth / inferred from electronic annotation                     | NM_031590 / GO:0005676 / extracellular region / inferred from electronic annotation / NM_031590 | NM_031590 / GO:0005015 / protein binding / inferred from electronic annotation / NM_031590             |  |
| LOC1034737     | ENSRNOT00000027883 | 10060279    | 6.47        | 6.76            | -1.22           | 2.27E-04 | ENSRNOT00000027883 / GO:0008955 / immune response / inferred from electronic annotation                      | ENSRNOT00000027883 / GO:0005622 / intracellular / inferred from electronic annotation           | ENSRNOT00000027883 / GO:0003723 / RNA binding / inferred from electronic annotation                    |  |
| Tnc2           | NM_017185          | 10712471    | 4.85        | 5.13            | -1.21           | 8.06E-04 | NM_017185 / GO:0003009 / skeletal muscle contraction / not recorded / NM_017185 / GO:0006037                 | NM_017185 / GO:0005634 / nucleus / not recorded / NM_017185 / GO:000861 / tropomyosin complex   | NM_017185 / GO:0003674 / molecular function / no biological data available / NM_017185                 |  |
| —              | —                  | 10671483    | 6.81        | 6.48            | -1.21           | 4.55E-05 | —                                                                                                            | —                                                                                               | —                                                                                                      |  |
| Neug1          | NM_019207          | 10719599    | 5.30        | 5.57            | -1.20           | 4.54E-04 | NM_019207 / GO:0007275 / multicellular organismal development / inferred from electronic annotation          | NM_019207 / GO:0005634 / nucleus / inferred from electronic annotation / ENSRNOT00000118916     | NM_019207 / GO:0003677 / DNA binding / inferred from electronic annotation / NM_019207                 |  |
| Itgq           | NM_001014230       | 10711601    | 4.26        | 4.53            | -1.20           | 7.36E-04 | —                                                                                                            | —                                                                                               | —                                                                                                      |  |
| —              | —                  | 10688794    | 2.57        | 2.83            | -1.19           | 4.67E-04 | —                                                                                                            | —                                                                                               | —                                                                                                      |  |
| RSD1681557     | NM_001108929       | 1062548     | 7.71        | 7.96            | -1.19           | 9.14E-04 | —                                                                                                            | NM_001108955 / GO:0046905 / keratin filament / inferred from electronic annotation              | NM_001108955 / GO:0005955 / electron carrier activity / inferred from electronic annotation            |  |
| —              | —                  | 10779427    | 4.90        | 5.15            | -1.19           | 2.81E-04 | —                                                                                                            | —                                                                                               | —                                                                                                      |  |
| Scaat5         | NM_001138655       | 1078131     | 5.90        | 6.15            | -1.19           | 5.51E-04 | NM_001138655 / GO:0008879 / cellular ion homeostasis / not recorded / NM_001138655                           | NM_001138655 / GO:000887 / integral to plasma membrane / not recorded / NM_001138655            | NM_001138655 / GO:0003044 / scavenger receptor activity / inferred from electronic annotation          |  |
| Tgpl1          | ENSRNOT00000002834 | 10710063    | 6.66        | 6.90            | -1.18           | 5.57E-04 | —                                                                                                            | ENSRNOT00000002834 / GO:0005737 / cytoplasm / not recorded / ENSRNOT00000002834 / GO:000573     | —                                                                                                      |  |
| Krtap4.7       | ENSRNOT00000016879 | 10747162    | 6.89        | 7.13            | -1.18           | 8.09E-04 | —                                                                                                            | —                                                                                               | —                                                                                                      |  |
| Nhe            | NM_001109149       | 10723220    | 4.57        | 4.80            | -1.18           | 2.13E-04 | NM_001109149 / GO:0007204 / elevation of cytosolic calcium ion concentration                                 | NM_001109149 / GO:0019171 / synapsome / inferred from direct assay / ENSRNOT00000014039         | NM_001109149 / GO:0031710 / neurotransmitter B receptor binding / inferred from physical interaction   |  |
| RSD168166      | NM_001016762       | 10737622    | 5.19        | 5.42            | -1.17           | 9.62E-05 | —                                                                                                            | —                                                                                               | —                                                                                                      |  |
| Tgrrap3        | NM_001047100       | 10060263    | 5.83        | 6.05            | -1.17           | 1.04E-04 | NM_001047100 / GO:0006508 / proteolysis / inferred from electronic annotation                                | NM_001047100 / GO:000886 / plasma membrane / inferred from electronic annotation                | NM_001047100 / GO:0004252 / serine-type endopeptidase activity / inferred from electronic annotation   |  |
| —              | —                  | 10736596    | 7.10        | 7.32            | -1.17           | 1.24E-04 | —                                                                                                            | —                                                                                               | —                                                                                                      |  |
| LOC279158      | ENSRNOT00000006804 | 10064000    | 6.65        | 6.87            | -1.16           | 7.33E-04 | —                                                                                                            | ENSRNOT00000006804 / GO:0005634 / nucleus / inferred from electronic annotation                 | ENSRNOT00000006804 / GO:0003677 / DNA binding / inferred from electronic annotation                    |  |
| Abca10         | NM_001108201       | 10071696    | 6.05        | 6.26            | -1.16           | 3.92E-04 | NM_001108201 / GO:0008190 / biological process / no biological data available                                | NM_001108201 / GO:0005737 / cellular component / no biological data available                   | NM_001108201 / GO:0003674 / molecular function / no biological data available                          |  |
| —              | —                  | 10732272    | 4.52        | 4.73            | -1.16           | 3.53E-04 | —                                                                                                            | —                                                                                               | —                                                                                                      |  |
| —              | —                  | 10071048    | 5.04        | 5.25            | -1.16           | 4.51E-04 | —                                                                                                            | —                                                                                               | —                                                                                                      |  |
| Glyat1         | NM_177936          | 10024298    | 5.64        | 5.85            | -1.16           | 1.34E-04 | NM_177936 / GO:0007185 / signal transduction / inferred from electronic annotation / NM_177936               | NM_177936 / GO:000886 / plasma membrane / inferred from electronic annotation / NM_177936       | NM_177936 / GO:0004872 / receptor activity / inferred from electronic annotation / NM_177936           |  |
| Upk3a          | NM_001130507       | 10089291    | 5.82        | 6.02            | -1.15           | 2.61E-04 | NM_001130507 / GO:0009092 / cell morphogenesis / not recorded / NM_001130507 / GO:0001822                    | NM_001130507 / GO:0016234 / apical plasma membrane / not recorded / ENSRNOT00000014935          | —                                                                                                      |  |
| —              | —                  | 10082841    | 9.78        | 9.98            | -1.15           | 9.82E-04 | —                                                                                                            | —                                                                                               | —                                                                                                      |  |
| Whf6           | NM_001070555       | 10748113    | 6.19        | 6.39            | -1.15           | 8.16E-04 | —                                                                                                            | —                                                                                               | —                                                                                                      |  |
| LOC362626      | NM_001025021       | 10060244    | 7.56        | 7.76            | -1.15           | 3.74E-04 | —                                                                                                            | NM_001025021 / GO:0016020 / membrane / inferred from electronic annotation / NM_001025021       | NM_001025021 / GO:0031072 / heat shock protein binding / inferred from electronic annotation           |  |
| Pcpln          | NM_001008209       | 10089233    | 5.71        | 5.91            | -1.15           | 8.34E-04 | —                                                                                                            | NM_001008209 / GO:0005604 / basement membrane / not recorded / ENSRNOT000000012757              | —                                                                                                      |  |
| Ctr136         | NM_001000160       | 10709458    | 4.76        | 4.95            | -1.14           | 3.16E-04 | NM_001000160 / GO:0007186 / G-protein coupled receptor protein signaling pathway                             | NM_001000160 / GO:0016021 / integral to membrane / inferred from electronic annotation          | NM_001000160 / GO:0004984 / olfactory receptor activity / inferred from electronic annotation          |  |
| Ohp2           | NM_001008851       | 10719508    | 4.94        | 5.12            | -1.13           | 7.20E-04 | —                                                                                                            | —                                                                                               | —                                                                                                      |  |
| Slu2           | NM_134457          | 10623338    | 7.94        | 8.12            | -1.13           | 5.47E-04 | NM_134457 / GO:0008511 / ubiquitin-dependent protein catabolic process / inferred from electronic annotation | NM_134457 / GO:0005624 / membrane fraction / inferred from direct assay / NM_134457             | NM_134457 / GO:0004842 / ubiquitin-protein ligase activity / inferred from electronic annotation       |  |
| Sddp2          | NM_001025682       | 10643750    | 4.74        | 4.92            | -1.13           | 8.88E-04 | —                                                                                                            | NM_001025682 / GO:0005737 / cytoplasm / not recorded / ENSRNOT000000012890 / GO:000837          | NM_001025682 / GO:0005015 / protein binding / inferred from electronic annotation / NM_001025682       |  |
| —              | —                  | 109114801   | 5.11        | 5.28            | -1.13           | 7.09E-04 | —                                                                                                            | —                                                                                               | —                                                                                                      |  |
| —              | —                  | 10776577    | 4.29        | 4.46            | -1.12           | 3.77E-04 | —                                                                                                            | —                                                                                               | —                                                                                                      |  |
| —              | —                  | 10763014    | 4.95        | 5.11            | -1.12           | 2.30E-05 | —                                                                                                            | —                                                                                               | —                                                                                                      |  |
| Kb101          | NM_001108170       | 10911745    | 3.80        | 3.96            | -1.12           | 3.96E-04 | —                                                                                                            | —                                                                                               | —                                                                                                      |  |
| Gp162          | NM_001108646       | 10605978    | 6.47        | 6.62            | -1.11           | 5.94E-04 | —                                                                                                            | —                                                                                               | —                                                                                                      |  |
| Fam170a        | NM_001126293       |             |             |                 |                 |          |                                                                                                              |                                                                                                 |                                                                                                        |  |

HFD, high fat diet.

a Values represent fluorescent intensity of probe set and are presented in log 2 space.

b Fold change is gene expression of female offspring from HFD father relative to control.

Morris\_Supplementary\_Table\_3

## Molecular networks of differentially expressed islet genes of female offspring

| ID                                              | Molecules in Networks generated from differentially expressed genes                                                                                                                                                                                                                         | Score | Focus Molecules | Top Functions                                                                                        |
|-------------------------------------------------|---------------------------------------------------------------------------------------------------------------------------------------------------------------------------------------------------------------------------------------------------------------------------------------------|-------|-----------------|------------------------------------------------------------------------------------------------------|
| <b>Significance at <math>P &lt; 0.01</math></b> |                                                                                                                                                                                                                                                                                             |       |                 |                                                                                                      |
| 1                                               | Ap1, CBX1, CBX3, CFL1, FCAR, Histone h3, Histone h4, HIVEP1, Iga, IL1, IL12 (complex), Interferon alpha, JAK, LDL, LY96, MPL, MST1, NEUROG1, NFkB (complex), OSGIN1, PTGDR, RARB, RPRM, SELE, SIAH2, STAT, STAT1, STAT5a/b, SUV39H1, TANK, TAX1BP1, TCEA1, TNFSF14, TXNDC17, USP18          | 32    | 23              | Gene Expression, Cell-To-Cell Signaling and Interaction, Cellular Movement                           |
| 2                                               | AKR1B7, Akt, ATG16L1, Calmodulin, Caspase, DAP3, DUSP9, ERK, ERK1/2, FOXO6, FSH, GHRL, GRIN1, Hsp90, HTR7, Insulin, IRS2, Lh, MAP2K4, MAP3K4, NMB, P38 MAPK, PDCD10, P13-kinase, PIK3C3, Pkc(s), PP2A, PTPN7, RAB27A, RAD17, Ras, RFC4, RP6-213H19.1, TMPO, ZFP386                          | 28    | 21              | Behavior, Digestive System Development and Function, Organismal Development                          |
| 3                                               | 26s Proteasome, Alp, Alpha tubulin, ASCL2, CDC42EP5, CHRD12, CXORF15, EGLN1, F Actin, FGD4, GDF5, GFAP, GTF2A1, HK3, HMGCS1, Immunoglobulin, IREB2, Jnk, KDM6A, KIF22, Mapk, NCOA6, Nfat (family), PDGF BB, PDGF-AA, PDLIM1, PODXL, POLH, SERTAD2, SLC29A1, TGS1, TRIB1, TTN, TUBA1B, TUBB3 | 21    | 17              | Cell Cycle, Embryonic Development, Gene Expression                                                   |
| 4                                               | ATP1A3, ATXN1, C10RF106, C9ORF82, CFL1, CMPK1, CSE1L, DCTD, EXO1, FAM189A2, GFAP, HOXA5, HSPH1, KLC2, MSH6, PAPLN, PMS2, PSD2, PSME3, PTN, RFC4, SFN, SHC1, SNCAIP, STAG1, SUB1, TACC3, TP53, TP53BP2, TUBB3, WFDCC2, YWHAZ, ZCCHC10, ZHX2, ZHX3                                            | 21    | 17              | DNA Replication, Recombination, and Repair, Nucleic Acid Metabolism, Small Molecule Biochemistry     |
| 5                                               | ACVR1B, ADCYAP1, AMHR2, APP, ASCC1, ASCC3, CD68, CFL1, DLL3, GFAP, HMGB1 (includes EG:25459), IL10, INHBA, JUN, Kallikrein, KLK1, LHB, LINGO1, MMP1 (includes EG:4312), PODXL, POU1F1, PSG18, PSMD9, RTN4R, SFTPD, SP6, SPI1, SPIB, SPON1, TGM4, TNFRSF19, TRIP4, WDR90, WT1, ZNF384        | 19    | 16              | Cell-To-Cell Signaling and Interaction, Free Radical Scavenging, Gene Expression                     |
| 6                                               | A1BG, C15ORF29, C10RF163, C20ORF4, DHRS7B, DYNC2LI1, EDEM3, EP300, FOXA2, FTSJ1, GH1, GOLIM4, GSK3B, HNF4A, Insulin, KLHDC3, LGALS3, MAP3K7, MYST2, NME1, NVL, ONECUT1, PBLD, PRKAB1, SHH, SLC2A4, SMAD3, SNRPD2, SNX5, STOML2, STRAP, TGFBI, TRAF6, TRMT12, UTP11L (includes EG:51118)     | 17    | 15              | Gene Expression, Cellular Development, Connective Tissue Development and Function                    |
| 7                                               | AP2M1, CAMK2B, CCDC33, FAM190B, GFAP, HGS, HTT, KCNMA1, KCNMB3, KLHDC5, LDOC1, MTOR, NDUFS3, NDUFS5, NDUFV2, PFK, PFKP, RCN3, RHOBTB3, RPH3A, SDHB, STX1A, SYN2, SYT3, SYT6, TELO2, TNNI2, TPI1, TRDMT1, UBQLN1, VDACC3, ZBTB8A, ZIC3, ZNF250                                               | 16    | 14              | Cell-To-Cell Signaling and Interaction, Nervous System Development and Function, Protein Trafficking |
| 8                                               | AKR1B7, AR, CHTF18, Ck2, CLDN3, CLDN4, CLDN5, CLDN6, CLDN7, CLDN8, CLDN18, DCTPP1, DIMT1L, EIF4E, ETV5, GJD3, GLCC1, KIF1C, LSM5, LSM6, LSM7, MC5R, MYC, NAP1L1, NKX2-1, OPRD1, OPRK1, POMC, PTPRT, PTRF, RRM2B, STAT3, TJP1, TMF1, WARS                                                    | 16    | 14              | Hematological Disease, Renal and Urological Disease, Endocrine System Development and Function       |
| 9                                               | ALAS2, ARNT, ARNT2, ARNTL, BAT3, BMI1, CACNG1, CCT5, E2F4, EPAS1, EPO, EXOSC8, FAM173A, FLT1, HOXC5, IMMT, IQCC, IRS2, KIF22, LDHA, LIFR, MYOM2, NFE2, NPAS4, OMA1, RAB19, SLC2A1, SMARCD2, STAT5A, STX5, SUV39H1, TYROBP, WDR76, XRN1, ZFX2                                                | 14    | 13              | Hematological Disease, Respiratory Disease, Gene Expression                                          |
| 10                                              | ABHD5, ALB, AP4E1, APTX, BTG1, C14ORF1, C1QTNF7, CFB, ELL, F2, HMGB1 (includes EG:25459), HYLS1, LLP, NFIC, NR3C1, Nuclear factor 1, PEG3, PHYHIP, PLIN5, PNPLA2, PODXL, POLE2, PROZ, SERPING1, SGPL1, SPAST, STOM, TFAP4, THBD, TMED9, TP53, TRIO, TUBB3, ZNF446, ZNF24 (includes EG:7572) | 14    | 13              | Lipid Metabolism, Small Molecule Biochemistry, Cardiovascular Disease                                |
| <b>Significance at <math>P &lt; 0.05</math></b> |                                                                                                                                                                                                                                                                                             |       |                 |                                                                                                      |
| 1                                               | AATK, BCKDHA, C/ebp, CEBPE, CENPJ, DAZAP1, FCAR, FOXE1, HK3, HPGD, IL13RA2, IRG1, KRT23, LRRC8C, LXN, PDPN, PDRG1, PEBP4, PHACTR3, PRG2, RAPGEF6, RASD1, RBP3, REC8, SCGB3A2, SERPIND1, SLC14A2, SMC1B, SSPO, TNF, TREM2, UBD, UGCG, UGT2B4, WTAP                                           | 36    | 34              | Lipid Metabolism, Molecular Transport, Small Molecule Biochemistry                                   |

## Morris\_Supplementary\_Table\_4

## Primer sequences for RT-PCR

| Gene symbol    | Forward Primer (5'-3') | Reverse Primer (5'-3')  |
|----------------|------------------------|-------------------------|
| Il13ra2        | CTTCCAGGCTAAAGCAGAATA  | CTCTAGTTTCTGGAAGCACTCTG |
| Fos            | AGCTCCCACCAAGTGTCTAC   | GGCTGGGGAATGGTAGTAG     |
| Ikbke          | TGTACAAGGCCCGGAATA     | CCTCCACTGCGAATAGCT      |
| $\beta$ -actin | CACCCGCGAGTACAACCTTC   | CCCATACCCACCATCACACC    |

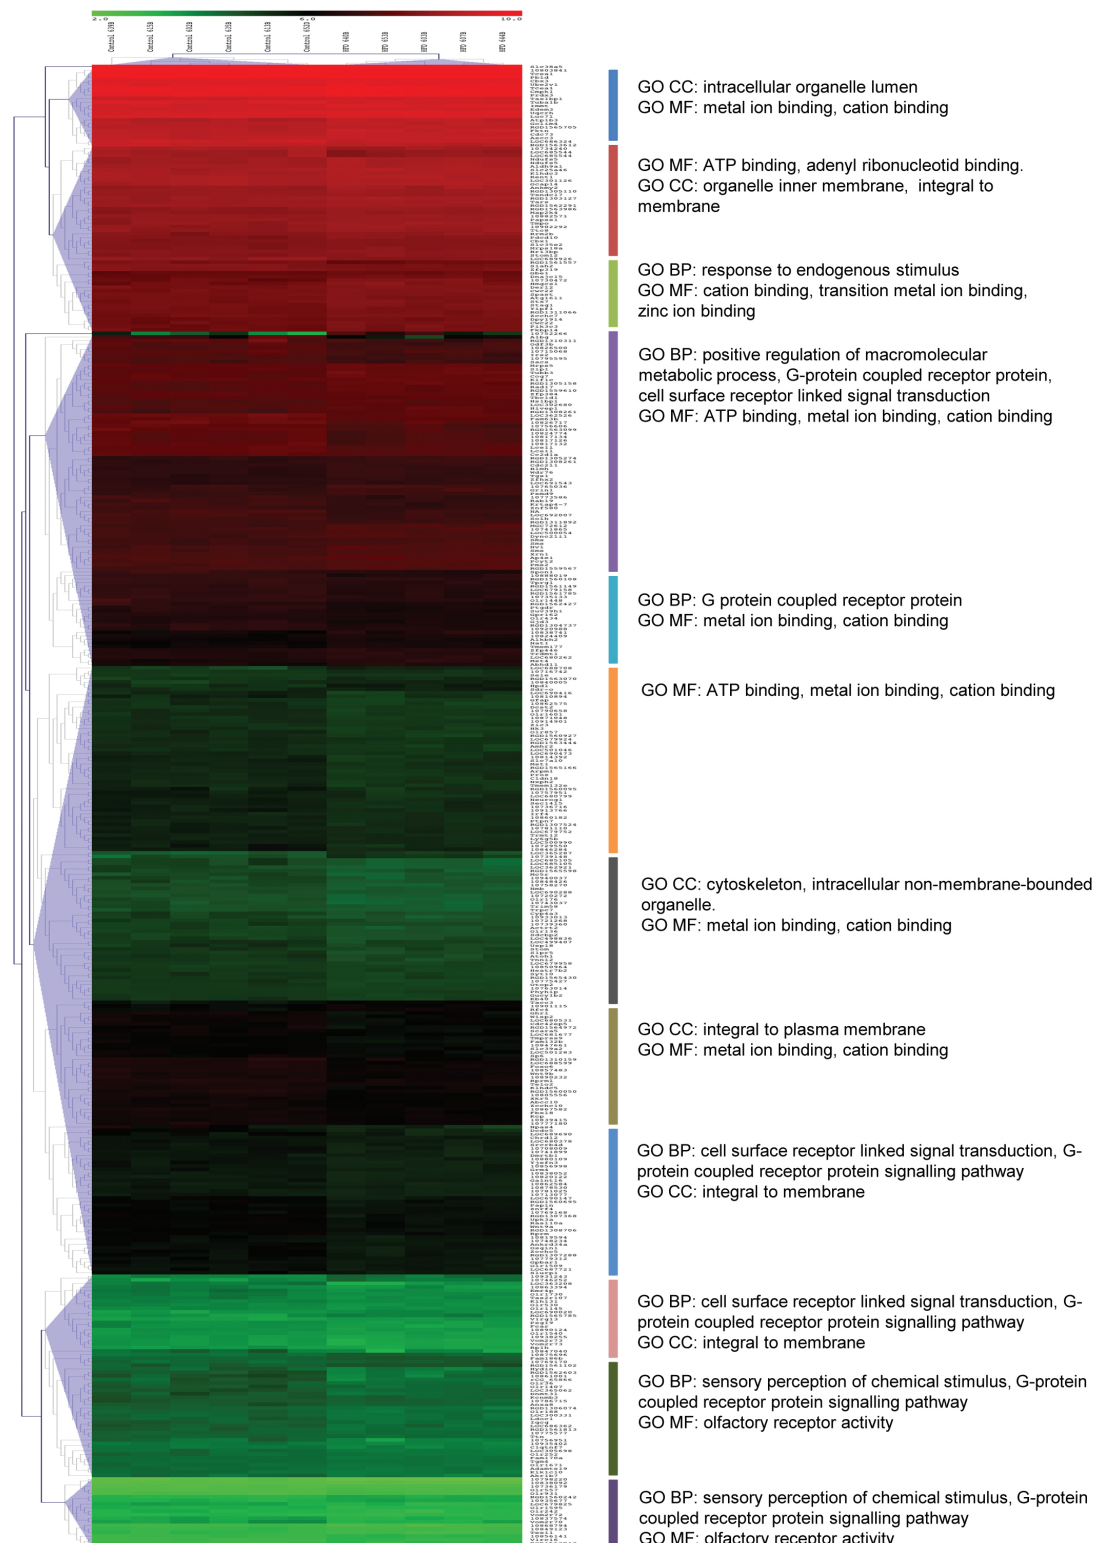

Supplementary Figure 1. Hierarchical clustering and functional annotation of differentially expressed islet genes ( $P < 0.01$ ) of HFD vs control offspring. Thirteen clusters were arbitrarily annotated and the most significant over-represented GO terms are described here. We observed an over-representation of genes belonging to cation and ATP binding, cytostructure and intracellular transport.

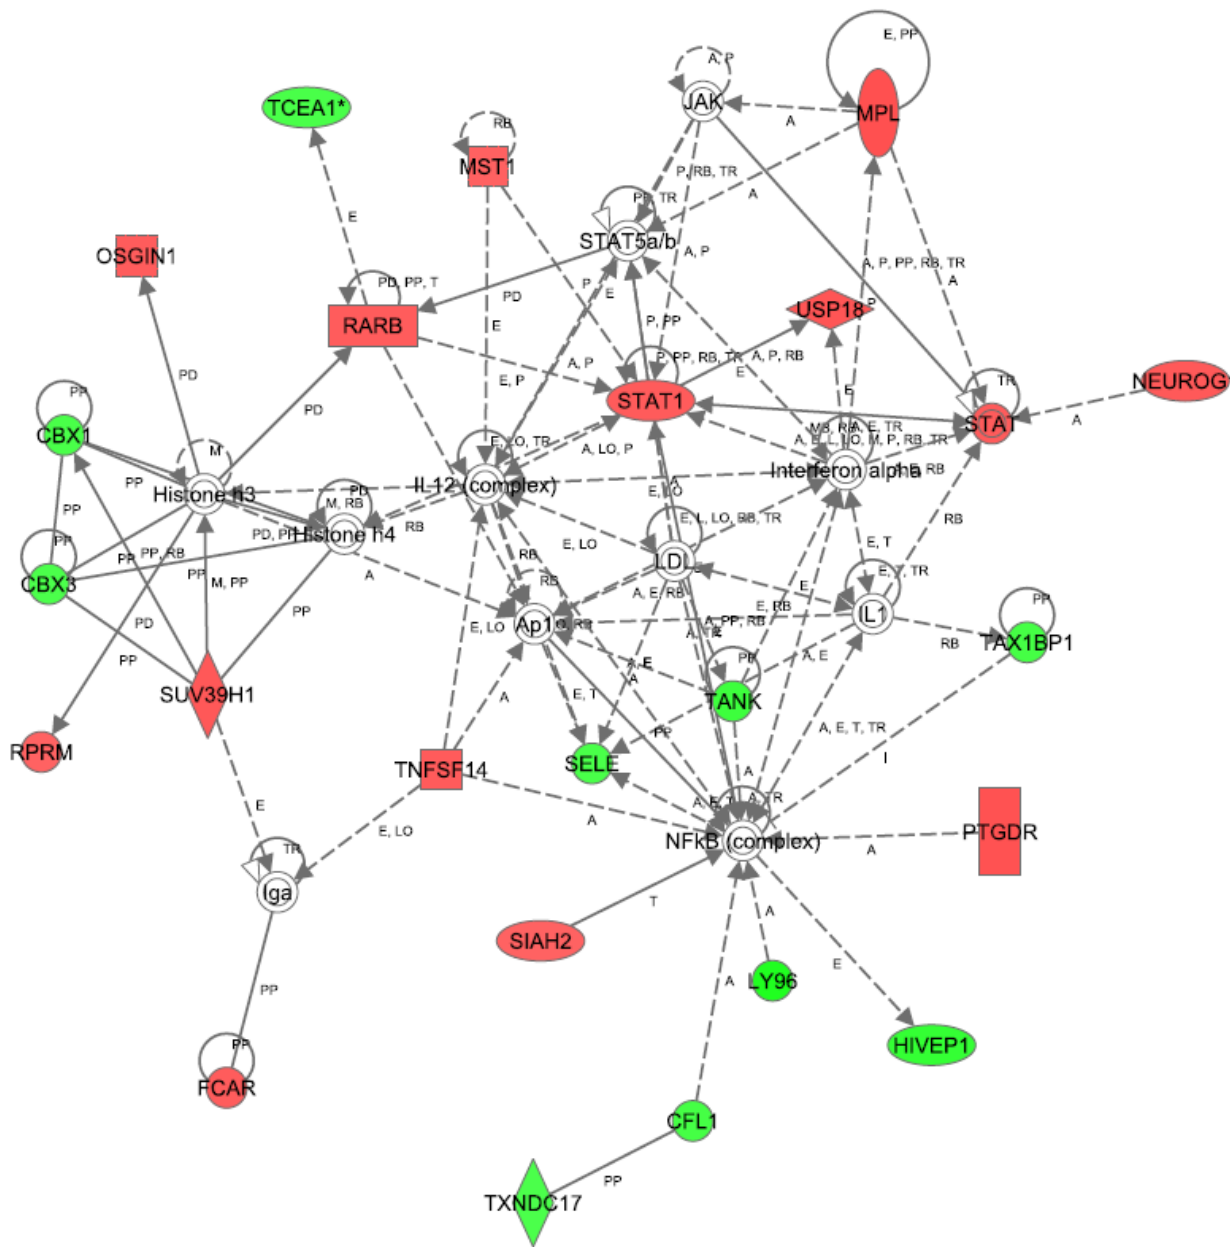

Supplementary Figure 2. Molecular Network 1 of differentially expressed islet genes in HFD female offspring,  $P < 0.01$  (Supplementary Table 3). This includes members of the enriched Jak-STAT signalling pathway. Molecules are represented as nodes, the biological relationship between two nodes is represented as an edge (line) and changed expression as up- (green) or down- (red) regulation.

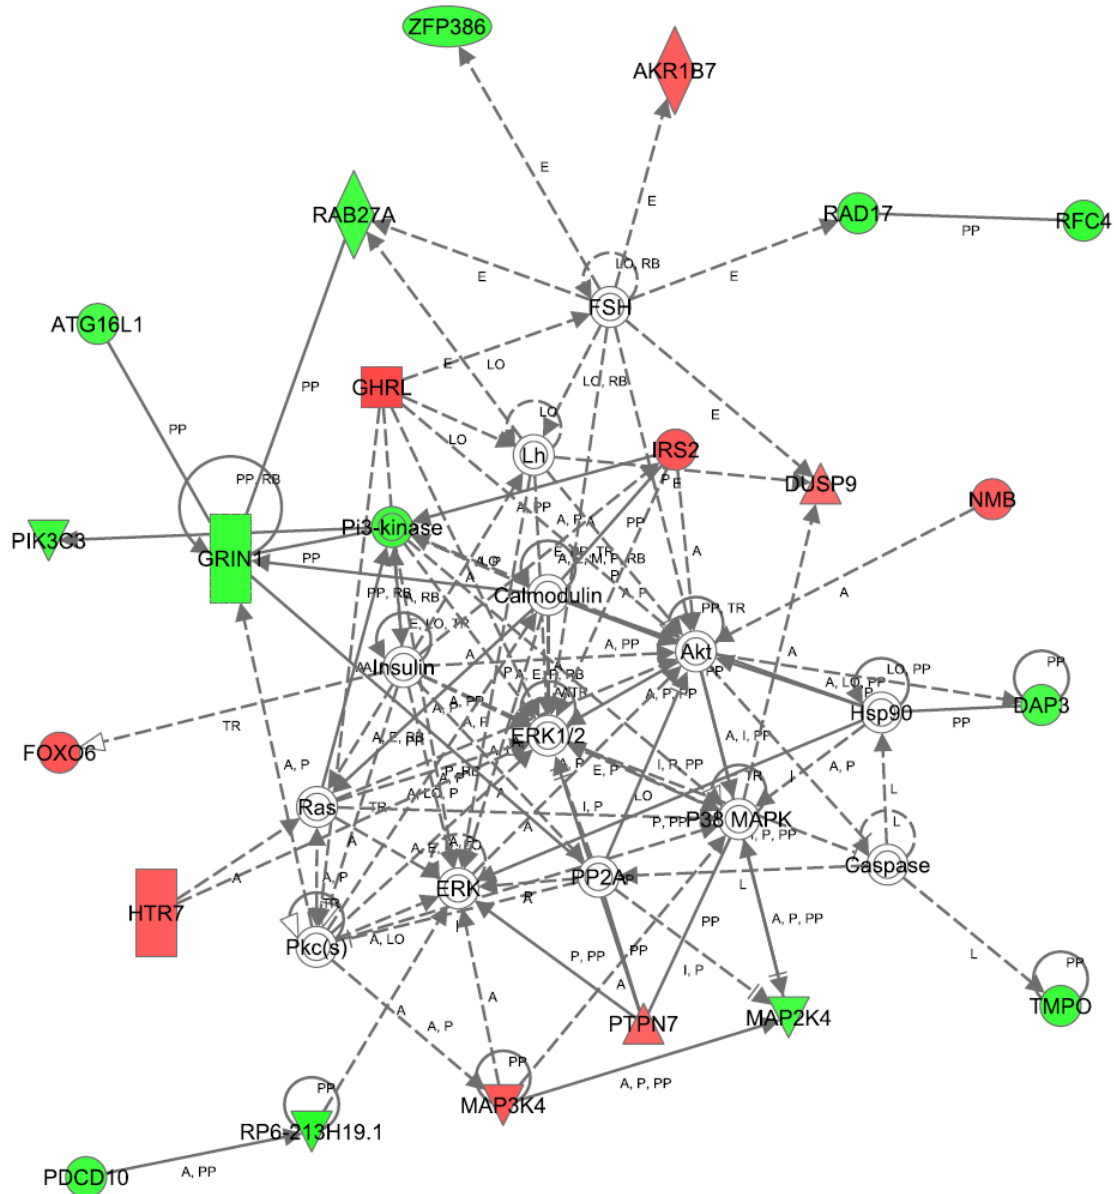

Supplementary Figure 3. Molecular Network 2 of differentially expressed islet genes in HFD female offspring,  $P < 0.01$  (Supplementary Table 3). This includes members of the enriched MAPK signalling pathway and other molecules related to insulin action. Molecules are represented as nodes, the biological relationship as an edge (line) and changed expression as up- (green) or down- (red) regulation.

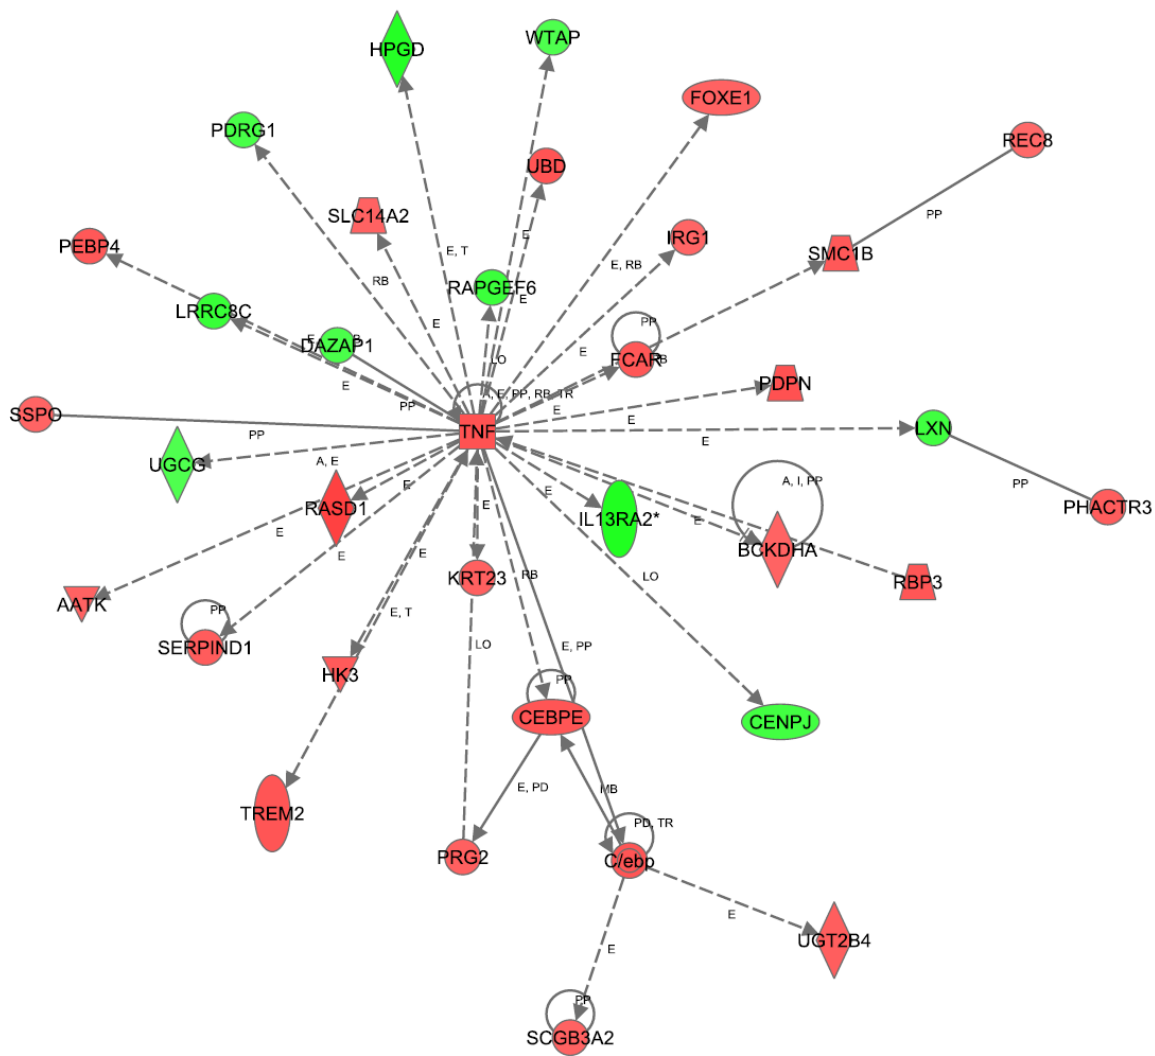

Supplementary Figure 4. Molecular Network 1 of differentially expressed islet genes of HFD female offspring,  $P < 0.05$  (Supplementary Table 3). This includes *tnf* (MAPK signalling and apoptosis pathways) and *Il13ra2* (Jak-STAT pathway), shown to be epigenetically modified by a paternal HFD. Molecules are represented as nodes, the biological relationship as an edge (line) and changed expression as up- (green) or down- (red) regulation.
